# Supplementary material
Source: publisher figshare collection journal article supplement (https://acs.figshare.com/ndownloader/files/3601545)
Supplement: Supplementary file 1 [file 3601545]

## Supporting Information

Figure S1. Variation of the dimensionless devolatilization index ( $D$ ) versus EFR ratio.

Figure S2. DTG curves of 50% EFR at different heating rates.

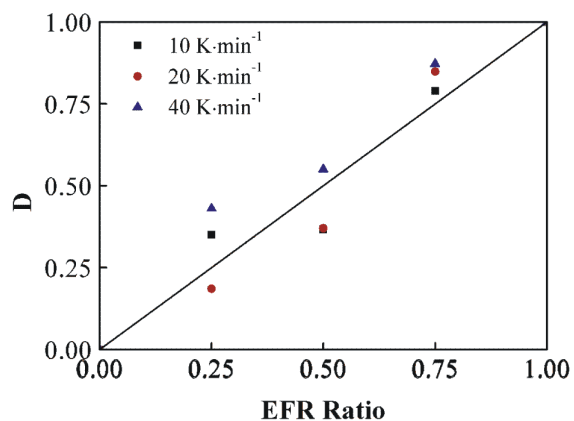

**Figure S1.** Variation of the dimensionless devolatilization index ( $D$ ) versus EFR ratio.

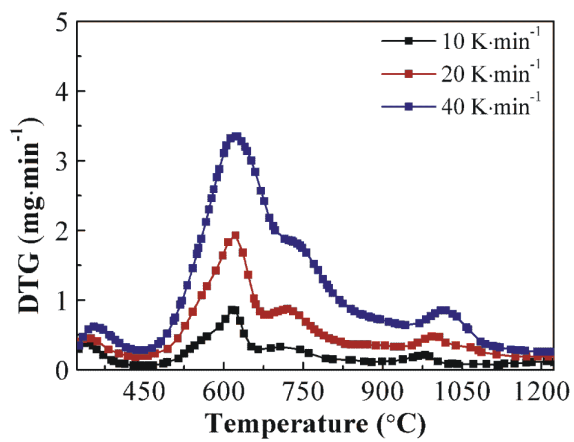

**Figure S2.** DTG curves of 50% EFR at different heating rates.
